# Supplementary material
Source: Springer Nature journal article supplement (https://www.springermedizin.de/resource/supplementary/12943_2014_1391_MOESM5_ESM.pdf/9552854)
Supplement: MOESM5 [file 9552854]

WT1  
E2F WT1  
SP1

-330  
**CBA** acaggcccgg gcagggcgcg cttccccgcg gttcccgcg cgcgcctcg cctcgcgc-----c  
**BALB** acaggcccgg gcagggcgcg cttccccgcg gttcccgcg cgcgcctcg cctcgcgcctcgcccc

SP1 - SP1 Modul WT1

SP1  
SP1 ATF

-270  
**CBA** ttgccgcgcg ccgcccgcac cgcgcgcgcg gttcccacac tgacgcgcgc ggcgcgcgcg  
**BALB** ttgccgcgcg ccgcccgcac cgcgcgcgcg gttcccacac tgacgcgcgc ggcgcgcgcg

AP1  
AP1 E2F  
ATF

-210  
AP1F SP1\* ATF\* E2\*

**CBA** tcgcggacgt gagcgcgggc ggaagtgcg tttcccgcg gttggcccgc ggctcgggtg  
**BALB** tcgcggacgt gagcgcgggc ggaagtgcg tttcccgcg gttggcccgc ggctcgggtg
